# Supplementary material for: Behavioral Health Treatment Patterns Among Employer-Insured Adults in Same- and Different-Gender Marriages and Domestic Partnerships
Source: Atypon-hosted journal article supplement (doi:10.1176/appi.ps.201700331), 2018-02-01
Supplement: appi.ps.201700331.ds001.pdf [file appi.ps.201700331.ds001.pdf]

**Appendix 1a: Characteristics of employer-insured female subscribers who shared coverage with a spouse or domestic partner, their employers, and health plans, by type of legal union**

|                                                                    | Different-Gender<br>Marriage<br>N=1,769,912 | Different-Gender<br>Domestic<br>Partnership<br>N=50,481 | Same-Gender<br>Domestic<br>Partnership<br>N=17,319 | Same-Gender<br>Marriage<br>N=6,213 | All Female<br>Subscribers<br>N=1,843,925 |
|--------------------------------------------------------------------|---------------------------------------------|---------------------------------------------------------|----------------------------------------------------|------------------------------------|------------------------------------------|
| <b><i>Individual Characteristics</i></b>                           |                                             |                                                         |                                                    |                                    |                                          |
| Subscriber age group (%)                                           |                                             |                                                         |                                                    |                                    |                                          |
| 18-24 years                                                        | 0.7                                         | 5.0                                                     | 1.4                                                | 1.0                                | 0.9                                      |
| 25-34                                                              | 16.3                                        | 38.5                                                    | 19.0                                               | 14.3                               | 17.0                                     |
| 35-44                                                              | 29.3                                        | 26.8                                                    | 28.1                                               | 28.6                               | 29.2                                     |
| 45-54                                                              | 33.8                                        | 20.8                                                    | 36.0                                               | 36.5                               | 33.5                                     |
| 55-64                                                              | 19.8                                        | 8.9                                                     | 15.6                                               | 19.5                               | 19.5                                     |
| Spouse/partner age group (%)                                       |                                             |                                                         |                                                    |                                    |                                          |
| 18-24 years                                                        | 0.4                                         | 2.5                                                     | 1.8                                                | 1.4                                | 0.5                                      |
| 25-34                                                              | 12.7                                        | 33.3                                                    | 18.8                                               | 14.4                               | 13.3                                     |
| 35-44                                                              | 27.0                                        | 29.9                                                    | 27.4                                               | 28.6                               | 27.1                                     |
| 45-54                                                              | 32.5                                        | 21.3                                                    | 33.3                                               | 34.8                               | 32.2                                     |
| 55-64                                                              | 27.5                                        | 13.1                                                    | 18.7                                               | 20.9                               | 27.0                                     |
| Number of dependents other than spouse/partner by age group (mean) |                                             |                                                         |                                                    |                                    |                                          |
| Under 6                                                            | 0.3                                         | 0.3                                                     | 0.1                                                | 0.2                                | 0.3                                      |
| 6-11                                                               | 0.3                                         | 0.2                                                     | 0.1                                                | 0.2                                | 0.3                                      |
| 12-17                                                              | 0.3                                         | 0.2                                                     | 0.1                                                | 0.2                                | 0.3                                      |
| 18-26                                                              | 0.3                                         | 0.2                                                     | 0.1                                                | 0.2                                | 0.3                                      |
| 27 and over                                                        | 0.0                                         | 0.0                                                     | 0.0                                                | 0.0                                | 0.0                                      |
| <b><i>Employer Characteristics</i></b>                             |                                             |                                                         |                                                    |                                    |                                          |
| Employer group size (%)                                            |                                             |                                                         |                                                    |                                    |                                          |
| >40K enrolled employees                                            | 31.1                                        | 36.7                                                    | 33.1                                               | 24.6                               | 31.2                                     |
| >10K & ≤ 40K                                                       | 44.9                                        | 46.6                                                    | 46.0                                               | 45.9                               | 44.9                                     |
| 5,000-10,000                                                       | 13.3                                        | 8.5                                                     | 12.2                                               | 15.0                               | 13.2                                     |
| <5,000                                                             | 10.8                                        | 8.2                                                     | 8.7                                                | 14.6                               | 10.7                                     |

|                                                            | Different-Gender<br>Marriage<br>N=1,769,912 | Different-Gender<br>Domestic<br>Partnership<br>N=50,481 | Same-Gender<br>Domestic<br>Partnership<br>N=17,319 | Same-Gender<br>Marriage<br>N=6,213 | All Female<br>Subscribers<br>N=1,843,925 |
|------------------------------------------------------------|---------------------------------------------|---------------------------------------------------------|----------------------------------------------------|------------------------------------|------------------------------------------|
| <b>Employer Industry (%)</b>                               |                                             |                                                         |                                                    |                                    |                                          |
| Agriculture, Forestry, Fishing, and Hunting                | 0.0                                         | 0.0                                                     | 0.0                                                | 0.1                                | 0.0                                      |
| Mining                                                     | 0.5                                         | 0.2                                                     | 0.3                                                | 0.5                                | 0.4                                      |
| Utilities                                                  | 4.3                                         | 1.0                                                     | 5.2                                                | 5.2                                | 4.2                                      |
| Construction                                               | 0.5                                         | 0.4                                                     | 0.3                                                | 1.6                                | 0.5                                      |
| Manufacturing                                              | 7.9                                         | 7.2                                                     | 6.9                                                | 10.2                               | 7.8                                      |
| Wholesale Trade                                            | 0.4                                         | 0.1                                                     | 0.6                                                | 0.3                                | 0.4                                      |
| Retail trade                                               | 3.2                                         | 0.5                                                     | 4.3                                                | 1.6                                | 3.1                                      |
| Transportation and Warehousing                             | 6.2                                         | 0.4                                                     | 3.5                                                | 3.1                                | 6.0                                      |
| Information                                                | 3.2                                         | 8.9                                                     | 8.1                                                | 6.4                                | 3.4                                      |
| Finance and Insurance                                      | 18.3                                        | 39.5                                                    | 17.6                                               | 8.7                                | 18.8                                     |
| Professional, Scientific, and Technical<br>Services        | 6.5                                         | 3.7                                                     | 6.6                                                | 7.5                                | 6.4                                      |
| Management of Companies and<br>Enterprises                 | 0.3                                         | 0.5                                                     | 0.2                                                | 0.4                                | 0.3                                      |
| Educational services                                       | 2.4                                         | 1.4                                                     | 2.4                                                | 4.2                                | 2.4                                      |
| Health care and social assistance                          | 3.1                                         | 1.5                                                     | 2.0                                                | 4.1                                | 3.0                                      |
| Arts, Entertainment, and Recreation                        | 1.5                                         | 1.2                                                     | 2.3                                                | 5.0                                | 1.6                                      |
| Accommodation and Food service                             | 1.1                                         | 0.4                                                     | 1.1                                                | 0.4                                | 1.1                                      |
| Other services (except public<br>administration)           | 0.9                                         | 0.1                                                     | 0.4                                                | 0.4                                | 0.9                                      |
| Public administration                                      | 4.0                                         | 0.1                                                     | 0.5                                                | 13.1                               | 3.9                                      |
| Unknown                                                    | 35.8                                        | 32.9                                                    | 37.9                                               | 27.4                               | 35.7                                     |
| <b>Health Plan Characteristics (BH Only and BH+EAP/WL)</b> |                                             |                                                         |                                                    |                                    |                                          |
| <b>Plan type (%)</b>                                       |                                             |                                                         |                                                    |                                    |                                          |
| More managed (e.g., HMO)                                   | 76.4                                        | 88.1                                                    | 80.5                                               | 62.8                               | 76.7                                     |
| Less managed (e.g., PPO, etc.)                             | 23.6                                        | 11.9                                                    | 19.5                                               | 37.2                               | 23.3                                     |

|                                                                 | Different-Gender<br>Marriage<br>N=1,769,912 | Different-Gender<br>Domestic<br>Partnership<br>N=50,481 | Same-Gender<br>Domestic<br>Partnership<br>N=17,319 | Same-Gender<br>Marriage<br>N=6,213 | All Female<br>Subscribers<br>N=1,843,925 |
|-----------------------------------------------------------------|---------------------------------------------|---------------------------------------------------------|----------------------------------------------------|------------------------------------|------------------------------------------|
| Carve-out (vs. carve-in) plan (%)                               |                                             |                                                         |                                                    |                                    |                                          |
| Carve-in                                                        | 68.6                                        | 76.3                                                    | 74.3                                               | 51.8                               | 68.8                                     |
| Carve-out                                                       | 31.4                                        | 23.7                                                    | 25.7                                               | 48.2                               | 31.2                                     |
| <b><i>Geographic and Time Factors</i></b>                       |                                             |                                                         |                                                    |                                    |                                          |
| Number of providers per 1000 members, by state & year<br>(mean) |                                             |                                                         |                                                    |                                    |                                          |
| MD                                                              | 0.9                                         | 0.9                                                     | 0.9                                                | 1.1                                | 0.9                                      |
| MSW                                                             | 3.5                                         | 3.5                                                     | 3.4                                                | 4.8                                | 3.5                                      |
| PHD                                                             | 1.2                                         | 1.3                                                     | 1.2                                                | 1.5                                | 1.2                                      |
| RN                                                              | 0.2                                         | 0.2                                                     | 0.2                                                | 0.4                                | 0.2                                      |
| Non-Independent Licensed                                        | 0.1                                         | 0.2                                                     | 0.3                                                | 0.4                                | 0.1                                      |
| Year enrolled in plan (%)                                       |                                             |                                                         |                                                    |                                    |                                          |
| 2008                                                            | 13.7                                        | 11.7                                                    | 12.0                                               | 13.0                               | 13.6                                     |
| 2009                                                            | 16.9                                        | 14.4                                                    | 16.4                                               | 18.7                               | 16.9                                     |
| 2010                                                            | 20.4                                        | 20.4                                                    | 21.0                                               | 18.9                               | 20.4                                     |
| 2011                                                            | 17.5                                        | 15.7                                                    | 17.4                                               | 17.4                               | 17.5                                     |
| 2012                                                            | 16.6                                        | 18.3                                                    | 16.9                                               | 17.1                               | 16.7                                     |
| 2013                                                            | 14.9                                        | 19.5                                                    | 16.4                                               | 14.9                               | 15.0                                     |
| Census Divisions (%)                                            |                                             |                                                         |                                                    |                                    |                                          |
| New England                                                     | 7.0                                         | 5.8                                                     | 5.3                                                | 16.5                               | 7.0                                      |
| Middle Atlantic                                                 | 10.0                                        | 14.3                                                    | 11.8                                               | 8.9                                | 10.1                                     |
| East North Central                                              | 17.1                                        | 13.3                                                    | 11.2                                               | 9.0                                | 16.9                                     |
| West North Central                                              | 8.8                                         | 9.2                                                     | 6.7                                                | 4.7                                | 8.8                                      |
| South Atlantic                                                  | 17.7                                        | 16.3                                                    | 19.9                                               | 15.8                               | 17.7                                     |
| East South Central                                              | 3.7                                         | 2.3                                                     | 2.9                                                | 2.3                                | 3.7                                      |
| West South Central                                              | 11.9                                        | 8.6                                                     | 13.3                                               | 10.7                               | 11.8                                     |
| Mountain                                                        | 9.0                                         | 11.0                                                    | 10.8                                               | 7.8                                | 9.0                                      |

|         | <b>Different-Gender<br/>Marriage<br/>N=1,769,912</b> | <b>Different-Gender<br/>Domestic<br/>Partnership<br/>N=50,481</b> | <b>Same-Gender<br/>Domestic<br/>Partnership<br/>N=17,319</b> | <b>Same-Gender<br/>Marriage<br/>N=6,213</b> | <b>All Female<br/>Subscribers<br/>N=1,843,925</b> |
|---------|------------------------------------------------------|-------------------------------------------------------------------|--------------------------------------------------------------|---------------------------------------------|---------------------------------------------------|
| Pacific | 14.8                                                 | 19.3                                                              | 18.2                                                         | 24.2                                        | 15.0                                              |

Source: Optum® health claims 2008-2013

**Appendix 1b: Characteristics of employer-insured male subscribers who shared coverage with a spouse or domestic partner, their employers, and health plans, by type of legal union**

|                                                                    | Different-Gender<br>Marriage<br>N=4,446,420 | Different-Gender<br>Domestic<br>Partnership<br>N=43,325 | Same-Gender<br>Domestic<br>Partnership<br>N=23,093 | Same-Gender<br>Marriage<br>N=6,883 | All Male<br>Subscribers<br>N=4,519,721 |
|--------------------------------------------------------------------|---------------------------------------------|---------------------------------------------------------|----------------------------------------------------|------------------------------------|----------------------------------------|
| <b><i>Individual Characteristics</i></b>                           |                                             |                                                         |                                                    |                                    |                                        |
| Subscriber age group (%)                                           |                                             |                                                         |                                                    |                                    |                                        |
| 18-24 years                                                        | 0.4                                         | 2.9                                                     | 0.7                                                | 0.7                                | 0.5                                    |
| 25-34                                                              | 13.3                                        | 40.3                                                    | 13.6                                               | 12.7                               | 13.5                                   |
| 35-44                                                              | 28.9                                        | 28.4                                                    | 30.3                                               | 30.8                               | 28.9                                   |
| 45-54                                                              | 32.7                                        | 18.0                                                    | 40.3                                               | 37.8                               | 32.6                                   |
| 55-64                                                              | 24.7                                        | 10.4                                                    | 15.1                                               | 18.0                               | 24.5                                   |
| Spouse/partner age group (%)                                       |                                             |                                                         |                                                    |                                    |                                        |
| 18-24 years                                                        | 1.1                                         | 6.7                                                     | 1.3                                                | 1.5                                | 1.2                                    |
| 25-34                                                              | 17.6                                        | 44.8                                                    | 14.9                                               | 16.5                               | 17.8                                   |
| 35-44                                                              | 30.1                                        | 24.0                                                    | 29.6                                               | 31.4                               | 30.0                                   |
| 45-54                                                              | 32.2                                        | 16.9                                                    | 38.1                                               | 34.1                               | 32.1                                   |
| 55-64                                                              | 19.0                                        | 7.7                                                     | 16.2                                               | 16.5                               | 18.9                                   |
| Number of dependents other than spouse/partner by age group (mean) |                                             |                                                         |                                                    |                                    |                                        |
| Under 6                                                            | 0.3                                         | 0.3                                                     | 0.0                                                | 0.1                                | 0.3                                    |
| 6-11                                                               | 0.4                                         | 0.2                                                     | 0.0                                                | 0.2                                | 0.4                                    |
| 12-17                                                              | 0.4                                         | 0.2                                                     | 0.0                                                | 0.1                                | 0.4                                    |
| 18-26                                                              | 0.4                                         | 0.2                                                     | 0.0                                                | 0.1                                | 0.4                                    |
| 27 and over                                                        | 0.0                                         | 0.0                                                     | 0.0                                                | 0.0                                | 0.0                                    |
| <b><i>Employer Characteristics</i></b>                             |                                             |                                                         |                                                    |                                    |                                        |
| Employer group size (%)                                            |                                             |                                                         |                                                    |                                    |                                        |
| >40K enrolled employees                                            | 34.5                                        | 27.1                                                    | 39.5                                               | 16.0                               | 34.4                                   |
| >10K & ≤ 40K                                                       | 39.3                                        | 52.3                                                    | 41.4                                               | 49.2                               | 39.5                                   |

|                                                            | Different-Gender<br>Marriage<br>N=4,446,420 | Different-Gender<br>Domestic<br>Partnership<br>N=43,325 | Same-Gender<br>Domestic<br>Partnership<br>N=23,093 | Same-Gender<br>Marriage<br>N=6,883 | All Male<br>Subscribers<br>N=4,519,721 |
|------------------------------------------------------------|---------------------------------------------|---------------------------------------------------------|----------------------------------------------------|------------------------------------|----------------------------------------|
| 5,000-10,000                                               | 13.8                                        | 10.2                                                    | 10.3                                               | 19.1                               | 13.7                                   |
| <5,000                                                     | 12.4                                        | 10.4                                                    | 8.8                                                | 15.7                               | 12.4                                   |
| Employer Industry (%)                                      |                                             |                                                         |                                                    |                                    |                                        |
| Agriculture, Forestry, Fishing, and Hunting                | 0.0                                         | 0.0                                                     | 0.0                                                | 0.1                                | 0.0                                    |
| Mining                                                     | 1.7                                         | 1.1                                                     | 0.2                                                | 1.2                                | 1.7                                    |
| Utilities                                                  | 7.2                                         | 3.0                                                     | 3.0                                                | 3.4                                | 7.1                                    |
| Construction                                               | 1.5                                         | 2.3                                                     | 0.2                                                | 1.2                                | 1.5                                    |
| Manufacturing                                              | 9.8                                         | 9.7                                                     | 3.5                                                | 6.7                                | 9.7                                    |
| Wholesale Trade                                            | 0.6                                         | 0.1                                                     | 0.1                                                | 0.0                                | 0.6                                    |
| Retail trade                                               | 1.3                                         | 0.6                                                     | 3.6                                                | 4.2                                | 1.4                                    |
| Transportation and Warehousing                             | 15.8                                        | 0.7                                                     | 17.5                                               | 5.2                                | 15.7                                   |
| Information                                                | 3.0                                         | 10.0                                                    | 7.1                                                | 8.4                                | 3.1                                    |
| Finance and Insurance                                      | 9.7                                         | 25.2                                                    | 20.2                                               | 13.2                               | 9.9                                    |
| Professional, Scientific, and Technical<br>Services        | 9.7                                         | 6.6                                                     | 5.3                                                | 6.9                                | 9.6                                    |
| Management of Companies and<br>Enterprises                 | 0.2                                         | 0.2                                                     | 0.4                                                | 0.1                                | 0.2                                    |
| Educational services                                       | 0.7                                         | 0.7                                                     | 1.6                                                | 3.3                                | 0.8                                    |
| Health care and social assistance                          | 0.5                                         | 0.4                                                     | 0.8                                                | 2.3                                | 0.5                                    |
| Arts, Entertainment, and Recreation                        | 2.0                                         | 3.2                                                     | 2.2                                                | 9.0                                | 2.0                                    |
| Accommodation and Food service                             | 2.3                                         | 0.5                                                     | 0.7                                                | 0.2                                | 2.2                                    |
| Other services (except public<br>administration)           | 0.4                                         | 0.1                                                     | 0.2                                                | 0.1                                | 0.4                                    |
| Public administration                                      | 2.8                                         | 0.2                                                     | 0.4                                                | 3.9                                | 2.8                                    |
| Unknown                                                    | 30.7                                        | 35.5                                                    | 33.0                                               | 30.8                               | 30.8                                   |
| <b>Health Plan Characteristics (BH Only and BH+EAP/WL)</b> |                                             |                                                         |                                                    |                                    |                                        |
| Plan type (%)                                              |                                             |                                                         |                                                    |                                    |                                        |

|                                                              | Different-Gender<br>Marriage<br>N=4,446,420 | Different-Gender<br>Domestic<br>Partnership<br>N=43,325 | Same-Gender<br>Domestic<br>Partnership<br>N=23,093 | Same-Gender<br>Marriage<br>N=6,883 | All Male<br>Subscribers<br>N=4,519,721 |
|--------------------------------------------------------------|---------------------------------------------|---------------------------------------------------------|----------------------------------------------------|------------------------------------|----------------------------------------|
| More managed (e.g., HMO)                                     | 73.8                                        | 89.5                                                    | 81.1                                               | 68.1                               | 74.0                                   |
| Less managed (e.g., PPO, etc.)                               | 26.2                                        | 10.5                                                    | 18.9                                               | 31.9                               | 26.0                                   |
| Carve-out (vs. carve-in) plan (%)                            |                                             |                                                         |                                                    |                                    |                                        |
| Carve-in                                                     | 73.0                                        | 83.5                                                    | 76.4                                               | 56.8                               | 73.1                                   |
| Carve-out                                                    | 27.0                                        | 16.6                                                    | 23.6                                               | 43.3                               | 26.9                                   |
| <b>Geographic and Time Factors</b>                           |                                             |                                                         |                                                    |                                    |                                        |
| Number of providers per 1000 members, by state & year (mean) |                                             |                                                         |                                                    |                                    |                                        |
| MD                                                           | 0.9                                         | 0.9                                                     | 0.8                                                | 0.9                                | 0.9                                    |
| MSW                                                          | 3.5                                         | 3.6                                                     | 3.1                                                | 3.4                                | 3.5                                    |
| PHD                                                          | 1.2                                         | 1.2                                                     | 1.2                                                | 1.2                                | 1.2                                    |
| RN                                                           | 0.2                                         | 0.2                                                     | 0.2                                                | 0.2                                | 0.2                                    |
| Non-Independent Licensed                                     | 0.2                                         | 0.2                                                     | 0.1                                                | 0.2                                | 0.2                                    |
| Year enrolled in plan (%)                                    |                                             |                                                         |                                                    |                                    |                                        |
| 2008                                                         | 14.1                                        | 10.0                                                    | 12.3                                               | 15.0                               | 14.1                                   |
| 2009                                                         | 16.9                                        | 13.4                                                    | 16.0                                               | 18.2                               | 16.9                                   |
| 2010                                                         | 19.4                                        | 18.8                                                    | 20.9                                               | 18.6                               | 19.4                                   |
| 2011                                                         | 17.4                                        | 17.0                                                    | 16.7                                               | 16.9                               | 17.4                                   |
| 2012                                                         | 16.6                                        | 19.5                                                    | 16.7                                               | 16.0                               | 16.7                                   |
| 2013                                                         | 15.5                                        | 21.4                                                    | 17.3                                               | 15.4                               | 15.6                                   |
| Census Divisions (%)                                         |                                             |                                                         |                                                    |                                    |                                        |
| New England                                                  | 6.7                                         | 5.9                                                     | 4.6                                                | 7.5                                | 6.7                                    |
| Middle Atlantic                                              | 10.5                                        | 16.8                                                    | 13.6                                               | 13.4                               | 10.6                                   |
| East North Central                                           | 16.4                                        | 12.0                                                    | 11.2                                               | 8.2                                | 16.4                                   |
| West North Central                                           | 8.7                                         | 6.8                                                     | 5.5                                                | 4.2                                | 8.7                                    |
| South Atlantic                                               | 18.1                                        | 17.3                                                    | 24.2                                               | 17.1                               | 18.1                                   |
| East South Central                                           | 4.9                                         | 2.4                                                     | 2.5                                                | 2.4                                | 4.8                                    |
| West South Central                                           | 14.6                                        | 10.8                                                    | 11.0                                               | 10.4                               | 14.6                                   |

|          | <b>Different-Gender<br/>Marriage<br/>N=4,446,420</b> | <b>Different-Gender<br/>Domestic<br/>Partnership<br/>N=43,325</b> | <b>Same-Gender<br/>Domestic<br/>Partnership<br/>N=23,093</b> | <b>Same-Gender<br/>Marriage<br/>N=6,883</b> | <b>All Male<br/>Subscribers<br/>N=4,519,721</b> |
|----------|------------------------------------------------------|-------------------------------------------------------------------|--------------------------------------------------------------|---------------------------------------------|-------------------------------------------------|
| Mountain | 9.2                                                  | 9.4                                                               | 7.7                                                          | 8.5                                         | 9.2                                             |
| Pacific  | 11.0                                                 | 18.6                                                              | 19.6                                                         | 28.4                                        | 11.1                                            |

Source: Optum® health claims 2008-2013



**Appendix 2a: Diagnoses among of employer-insured female adults with any service use in a calendar year, by type of legal union**

|                                                   | Different-Gender<br>Marriage | Different-Gender<br>Domestic<br>Partnership | Same-Gender<br>Domestic<br>Partnership | Same-Gender<br>Marriage |
|---------------------------------------------------|------------------------------|---------------------------------------------|----------------------------------------|-------------------------|
| <b>Total number of women with any service use</b> | <b>495,098</b>               | <b>9,440</b>                                | <b>5,221</b>                           | <b>2,058</b>            |
| Any adjustment disorder (%)                       | 31.0                         | 31.8                                        | 31.5                                   | 31.8                    |
| Any post-traumatic stress disorder (%)            | 4.8                          | 5.3                                         | 7.7                                    | 8.2                     |
| Any generalized anxiety (%)                       | 22.5                         | 24.9                                        | 23.4                                   | 25.6                    |
| Any obsessive-compulsive disorder (%)             | 2.1                          | 1.6                                         | 1.7                                    | 1.2                     |
| Any panic disorder (%)                            | 5.5                          | 6.3                                         | 4.3                                    | 4.3                     |
| Any phobia (%)                                    | 0.9                          | 0.9                                         | 1.1                                    | 1.3                     |
| Any cognitive disorder (%)                        | 0.7                          | 0.6                                         | 0.9                                    | 0.9                     |
| Any bipolar disorder (%)                          | 9.3                          | 8.4                                         | 11.6                                   | 8.9                     |
| Any depressive disorder (%)                       | 47.5                         | 44.0                                        | 47.5                                   | 47.7                    |
| Any personality disorder (%)                      | 1.0                          | 1.1                                         | 1.0                                    | 1.3                     |
| Any psychotic disorder (%)                        | 1.5                          | 1.0                                         | 1.1                                    | 1.0                     |
| Any alcohol use disorder (%)                      | 2.6                          | 3.5                                         | 3.4                                    | 3.4                     |
| Any drug use disorder (%)                         | 1.9                          | 2.6                                         | 2.3                                    | 1.6                     |
| Any other psychiatric disorder (%)                | 10.9                         | 11.0                                        | 10.2                                   | 11.2                    |
| <b>Number of behavioral health diagnoses (%)</b>  |                              |                                             |                                        |                         |
| 1                                                 | 68.0                         | 66.8                                        | 66.3                                   | 63.3                    |
| 2                                                 | 21.3                         | 21.3                                        | 20.7                                   | 24.2                    |
| 3 or more                                         | 10.7                         | 11.9                                        | 12.9                                   | 12.5                    |

Source: Optum® health claims 2008-2013

**Appendix 2b: Diagnoses among of employer-insured male adults with any service use in a calendar year, by type of legal union**

|                                                  | Different-Gender<br>Marriage | Different-Gender<br>Domestic<br>Partnership | Same-Gender<br>Domestic<br>Partnership | Same-Gender<br>Marriage |
|--------------------------------------------------|------------------------------|---------------------------------------------|----------------------------------------|-------------------------|
| <b>Total number of men with any service use</b>  | <b>319,125</b>               | <b>6,030</b>                                | <b>5,357</b>                           | <b>1,477</b>            |
| Any adjustment disorder (%)                      | 33.0                         | 30.7                                        | 24.7                                   | 24.7                    |
| Any post-traumatic stress disorder (%)           | 3.5                          | 3.1                                         | 3.6                                    | 3.2                     |
| Any generalized anxiety (%)                      | 19.9                         | 20.6                                        | 26.0                                   | 24.5                    |
| Any obsessive-compulsive disorder (%)            | 2.1                          | 1.5                                         | 2.8                                    | 3.0                     |
| Any panic disorder (%)                           | 4.3                          | 5.3                                         | 5.3                                    | 6.6                     |
| Any phobia (%)                                   | 1.1                          | 1.3                                         | 1.3                                    | 0.9                     |
| Any cognitive disorder (%)                       | 1.0                          | 0.7                                         | 0.7                                    | 0.7                     |
| Any bipolar disorder (%)                         | 7.3                          | 7.9                                         | 11.0                                   | 8.9                     |
| Any depressive disorder (%)                      | 39.8                         | 38.3                                        | 48.9                                   | 49.8                    |
| Any personality disorder (%)                     | 0.8                          | 0.9                                         | 0.9                                    | 1.0                     |
| Any psychotic disorder (%)                       | 1.3                          | 1.5                                         | 1.1                                    | 1.4                     |
| Any alcohol use disorder (%)                     | 6.6                          | 8.6                                         | 5.3                                    | 6.0                     |
| Any drug use disorder (%)                        | 3.7                          | 6.9                                         | 4.0                                    | 2.4                     |
| Any other psychiatric disorder (%)               | 11.7                         | 11.7                                        | 8.9                                    | 10.5                    |
| <b>Number of behavioral health diagnoses (%)</b> | <b>33.0</b>                  | <b>30.7</b>                                 | <b>24.7</b>                            | <b>24.7</b>             |
| 1                                                | 70.1                         | 67.8                                        | 65.4                                   | 65.7                    |
| 2                                                | 20.2                         | 20.8                                        | 22.2                                   | 22.8                    |
| 3 or more                                        | 9.7                          | 11.4                                        | 12.4                                   | 11.5                    |

Source: Optum® health claims 2008-2013
