# Supplementary material for: Behavioral Health Treatment Patterns Among Employer-Insured Adults in Same- and Different-Gender Marriages and Domestic Partnerships
Source: Atypon-hosted journal article supplement (doi:10.1176/appi.ps.201700331), 2018-02-01
Supplement: appi.ps.201700331.ds001.pdf [file appi.ps.201700331.ds001.pdf]

 


Psychiatry Online
